# Supplementary material for: Characterization of Spatial Air Pollution Patterns Near a Large Railyard Area in Atlanta, Georgia
Source: Int J Environ Res Public Health. 2019 Feb 13;16(4):535. doi: 10.3390/ijerph16040535 (PMC6407103; doi:10.3390/ijerph16040535)
Supplement: Supplementary file 1 [file ijerph-16-00535-s001.pdf]

## Supplemental Information

# Characterization of Spatial Air Pollution Patterns Near a Large Railyard Area in Atlanta, Georgia

Halley L. Brantley <sup>1</sup>, Gayle S.W. Hagler <sup>2,\*</sup>, Scott C. Herndon <sup>3</sup>, Paola Massoli <sup>3</sup>, Michael H. Bergin <sup>4</sup> and Armistead G. Russell <sup>5</sup>

<sup>1</sup> Department of Statistics, North Carolina State University, Raleigh, NC 27607, USA

<sup>2</sup> U.S. EPA Office of Research and Development, Research Triangle Park, NC 27711, USA

<sup>3</sup> Aerodyne Research Inc., Billerica, MA 01821, USA

<sup>4</sup> Department of Civil and Environmental Engineering, Duke University, Durham, NC 27708, USA

<sup>5</sup> Civil and Environmental Engineering, Georgia Institute of Technology, Atlanta, GA 30332, USA

\* Correspondence: [hagler.gayle@epa.gov](mailto:hagler.gayle@epa.gov)

Fig S1: Concentrations of BC aggregated by 50 m road segment during (left) winds from the north-northeast (middle) winds from the south-southwest and (right) calm winds. Segments are binned so that each color represents an equal number of road segments. Blue arrows represent range of mean hourly wind directions.

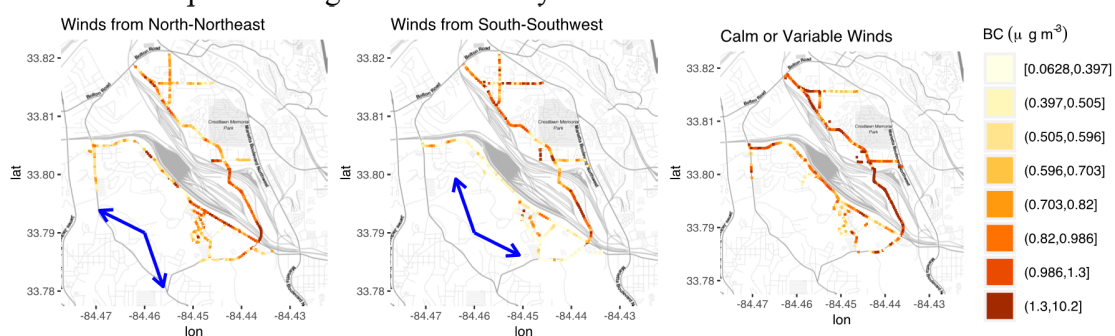

Fig. S2: Concentrations of Benzene aggregated by 50 m road segment during (left) winds from the north-northeast (middle) winds from the south-southwest and (right) calm winds. Segments are binned so that each color represents an equal number of road segments. Blue arrows represent range of mean hourly wind directions.

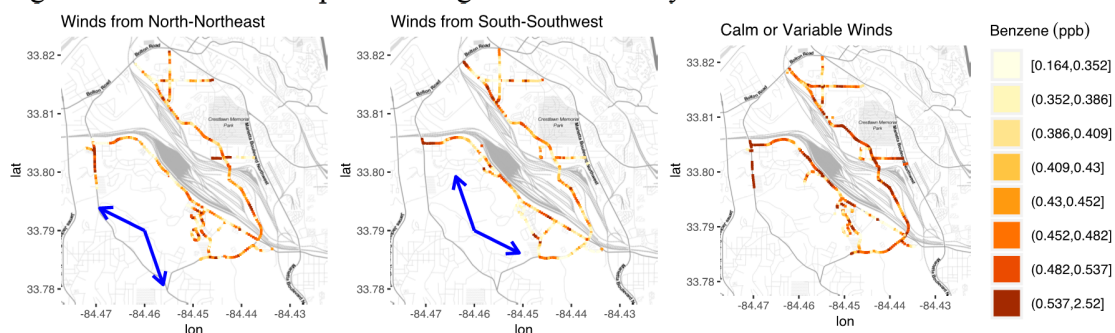

Fig. S3: Concentrations of CO aggregated by 50 m road segment during (left) winds from the north-northeast (middle) winds from the south-southwest and (right) calm winds. Segments are binned so that each color represents an equal number of road segments. Blue arrows represent range of mean hourly wind directions.

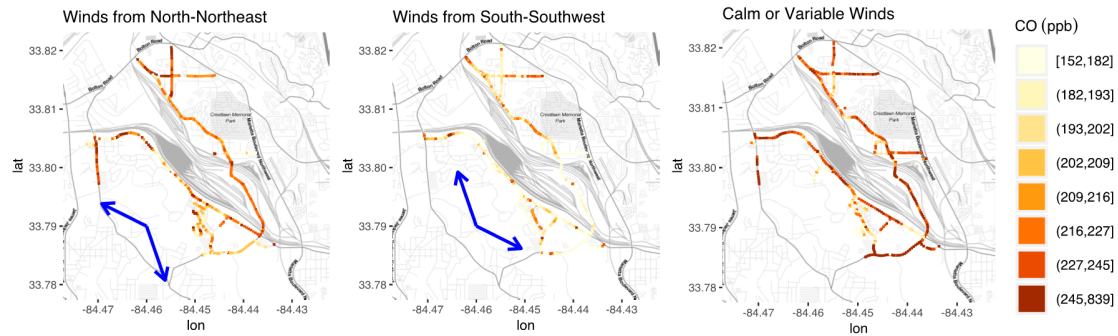

Fig. S4: Concentrations of particle extinction aggregated by 50 m road segment during (left) winds from the north-northeast (middle) winds from the south-southwest and (right) calm winds. Segments are binned so that each color represents an equal number of road segments. Blue arrows represent range of mean hourly wind directions.

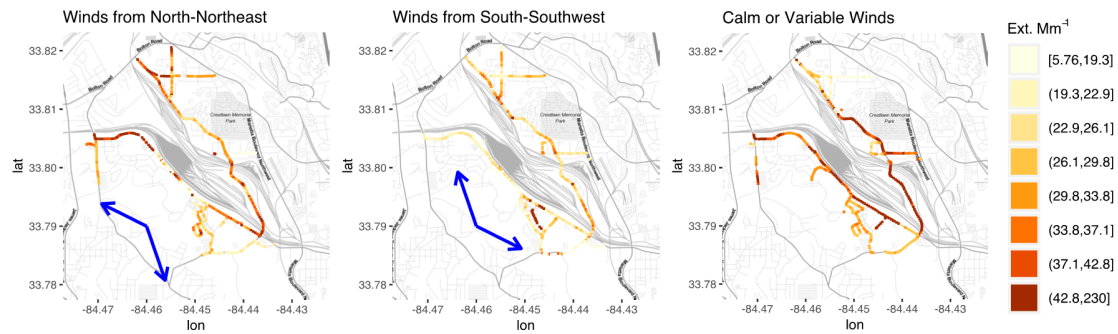

Fig. S5: Concentrations of NO aggregated by 50 m road segment during (left) winds from the north-northeast (middle) winds from the south-southwest and (right) calm winds. Segments are binned so that each color represents an equal number of road segments. Blue arrows represent range of mean hourly wind directions.

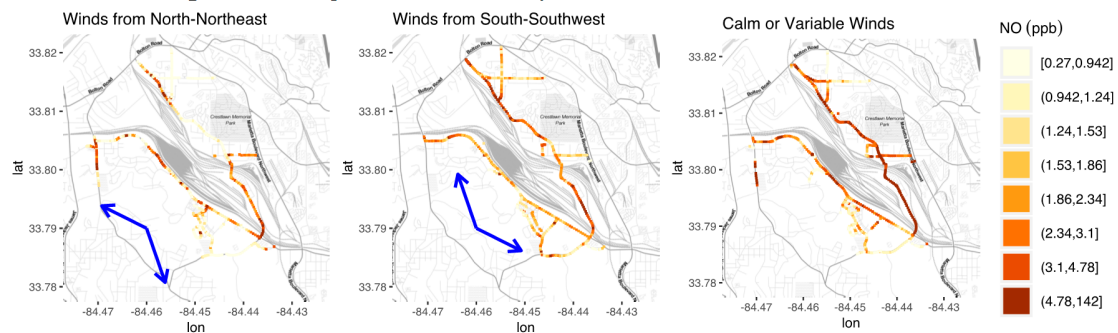

Fig. S6: Concentrations of NO<sub>y</sub> aggregated by 50 m road segment during (left) winds from the north-northeast (middle) winds from the south-southwest and (right) calm

winds. Segments are binned so that each color represents an equal number of road segments. Blue arrows represent range of mean hourly wind directions.

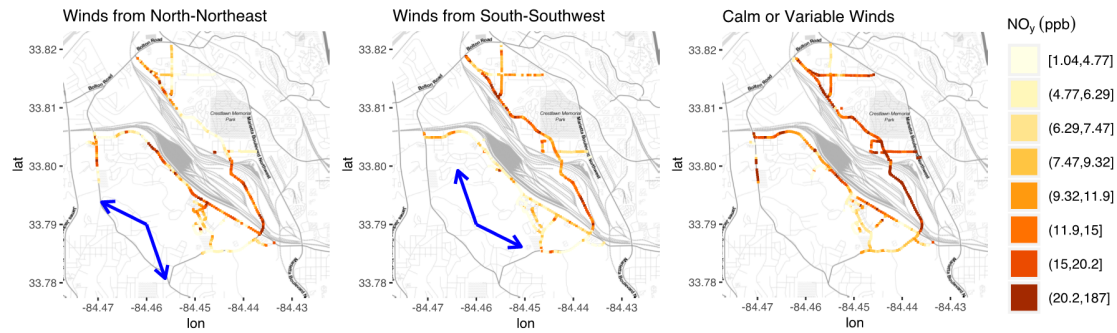

Fig. S7: Particle Number aggregated by 50 m road segment during (left) winds from the north-northeast (middle) winds from the south-southwest and (right) calm winds. Segments are binned so that each color represents an equal number of road segments. Blue arrows represent range of mean hourly wind directions.

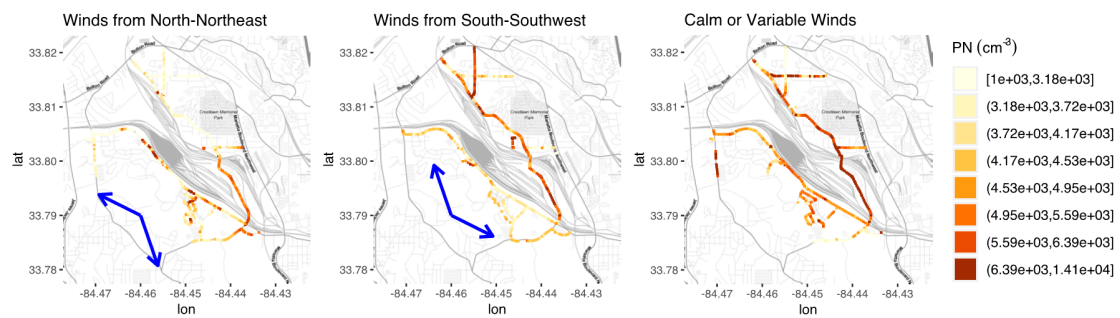

Fig. S8: Concentrations of Toluene aggregated by 50 m road segment during (left) winds from the north-northeast (middle) winds from the south-southwest and (right) calm winds. Segments are binned so that each color represents an equal number of road segments. Blue arrows represent range of mean hourly wind directions.

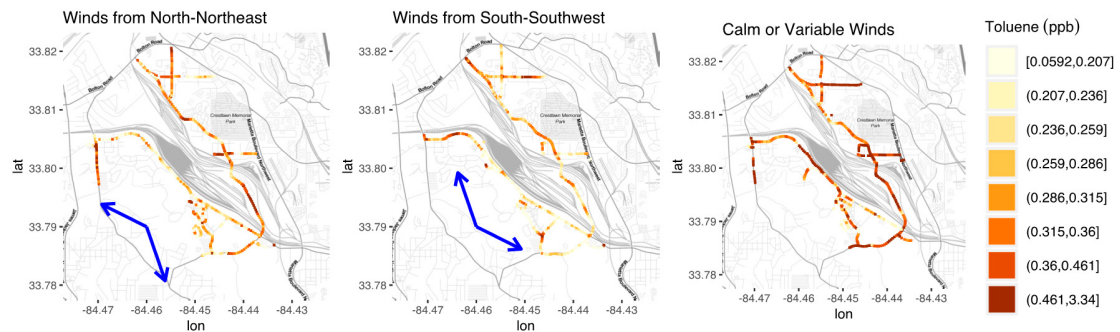

Table S1: Estimated effect of each of the predictors on the mean log transformed pollutant concentration, using both the independent and spatial error models. Effects have been exponentiated to represent factor increases.

|            | $exp(\beta_0)$ (intercept) |         | $exp(\beta_1)$ (calm) |         | $exp(\beta_2)$ (railyard) |         | $exp(\beta_3)$ (downwind) |         | $exp(\beta_4)$ (distance) |         |
|------------|----------------------------|---------|-----------------------|---------|---------------------------|---------|---------------------------|---------|---------------------------|---------|
|            | Independent                | Spatial | Independent           | Spatial | Independent               | Spatial | Independent               | Spatial | Independent               | Spatial |
| NO         | 1.941                      | 1.024   | 1.514                 | 1.701   | 1.941                     | 1.81    | 1.117                     | 1.453   | 0.405                     | 0.455   |
| NO2        | 6.357                      | 1.026   | 1.59                  | 2.04    | 1.852                     | 1.946   | 1.229                     | 1.668   | 0.472                     | 0.627   |
| NOy        | 8.67                       | 1.02    | 1.48                  | 1.714   | 1.803                     | 1.794   | 1.183                     | 1.404   | 0.482                     | 0.581   |
| BC         | 0.605                      | 1.019   | 1.422                 | 1.466   | 1.778                     | 1.804   | 1.218                     | 1.457   | 0.673                     | 0.723   |
| CO         | 200.524                    | 1.005   | 1.13                  | 1.208   | 1.019                     | 1.038   | 1.026                     | 1.025   | 1.055                     | 1.098   |
| Extinction | 25.766                     | 1.014   | 1.401                 | 1.488   | 1.236                     | 1.267   | 1.092                     | 1.172   | 0.837                     | 0.803   |
| PN         | 4363.665                   | 1.011   | 1.164                 | 1.21    | 1.309                     | 1.27    | 1.002                     | 1.138   | 0.743                     | 0.743   |
| Benzene    | 0.43                       | 1.008   | 1.135                 | 1.149   | 1.035                     | 1.01    | 1.015                     | 0.989   | 0.939                     | 0.934   |
| Toluene    | 0.292                      | 1.014   | 1.352                 | 1.37    | 1.265                     | 1.126   | 0.99                      | 0.906   | 1.126                     | 1.039   |
| Acetal.    | 2.084                      | 1.005   | 1.138                 | 1.137   | 1.106                     | 1.031   | 1.079                     | 1.048   | 0.945                     | 0.866   |
